# Supplementary material
Source: PubMed Central journal article supplement (PMC7398445)
Supplement: Supp_Fig1.pdf [file Supp_Fig1.pdf]

## Supplementary figures

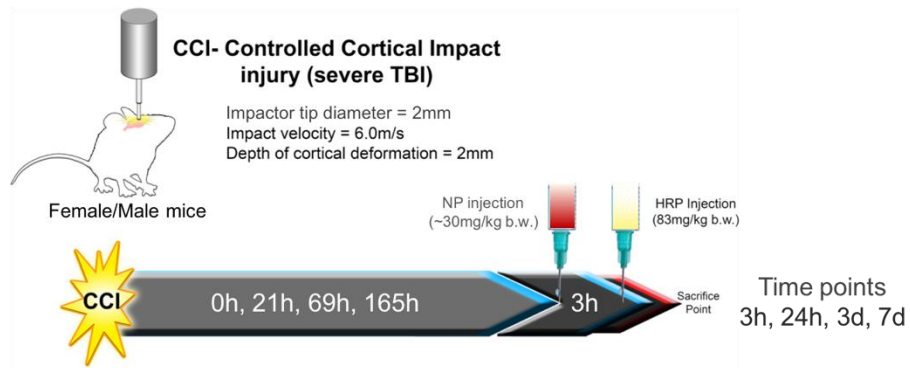

**Fig S1:** *In vivo* experimental study design: Nanoparticles (40 nm) were intravenously injected in CCI induced adult mice 3 h before sacrifice at 3 h, 24 h, 3 d and 7 d post-injury. The positive control BBB permeability marker, horseradish peroxidase (HRP) was injected 10 mins before sacrifice.
