# Supplementary material
Source: PubMed Central journal article supplement (PMC7398445)
Supplement: Supp_Fig2.pdf [file Supp_Fig2.pdf]

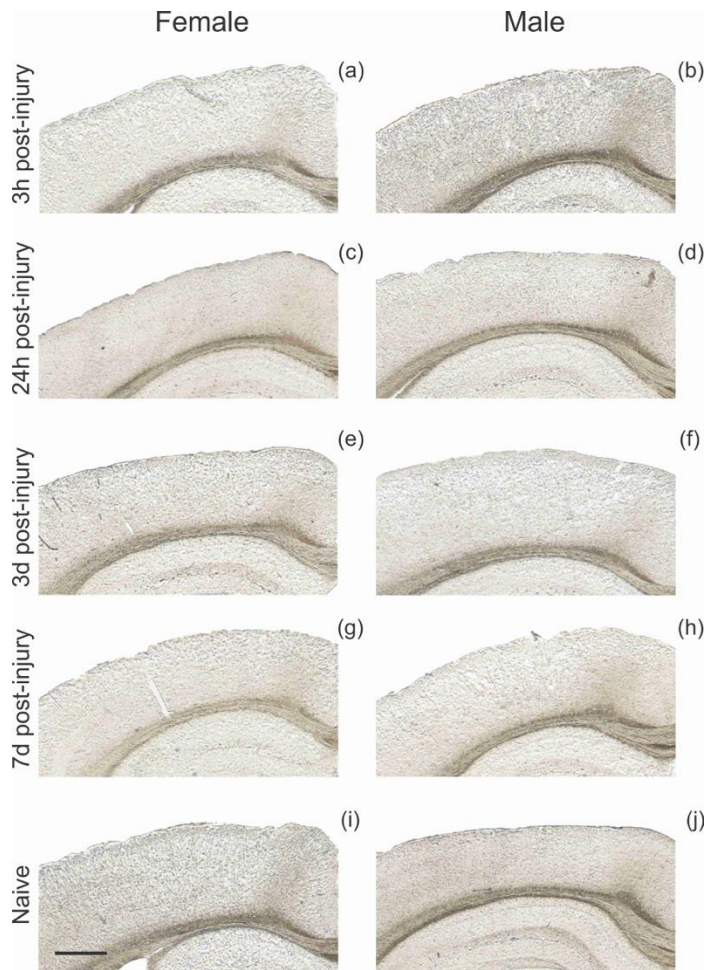

**Fig. S2:** HRP stained tissue after TBI in contralateral hemisphere: Representative images of HRP stained tissue at 3 h (a, b), 24 h (c, d), 3 d (e, f), 7 d (g, h) post-CCI and naïve (i, j). The first column shows the HRP response in female cohort and the second column in males. Scale bar=750 $\mu$ m.
