# Supplementary material
Source: PubMed Central journal article supplement (PMC7398445)
Supplement: Supp_Fig3.pdf [file Supp_Fig3.pdf]

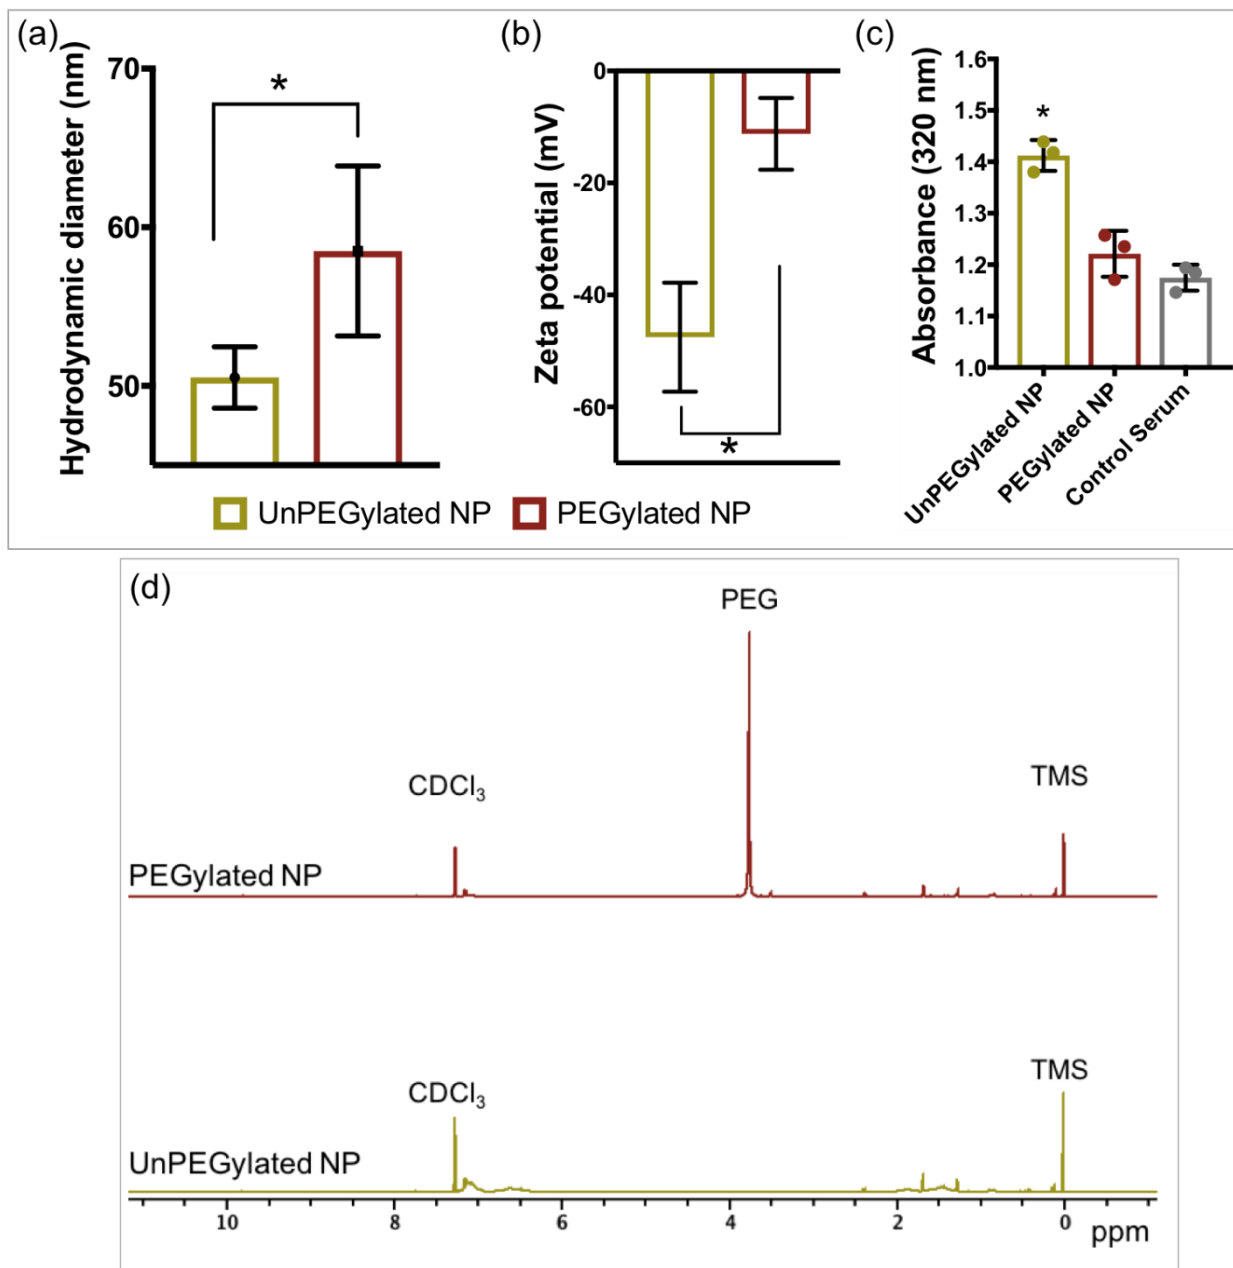

**Fig. S3: Nanoparticle characterization** (a) Hydrodynamic diameter of unPEGylated and PEGylated NPs, Student's t-test, \*  $p < 0.05$ , Error bars represent standard deviation,  $n=3$ . (b) Zeta potential of unPEGylated and PEGylated NPs. Student's t-test, \*  $p < 0.05$ , Error bars represent standard deviation,  $n=3$ . (c) Stability of NP: Absorbance of unPEGylated and PEGylated NP after 3 h incubation. UnPEGylated NPs shows significant increase in absorbance compared to control serum, \*  $p < 0.05$ , One-way ANOVA, Tukey's comparison. Error bars represent standard error of mean,  $n=3$ .
