# Supplementary material
Source: PubMed Central journal article supplement (PMC7398445)
Supplement: Supp_Fig4.pdf [file Supp_Fig4.pdf]

(d)  $^1\text{H}$  NMR of polystyrene NPs before and after PEGylation (2kDa). The appearance of PEG ( $\delta = 3.63$ ) peak confirms that the PEG was covalently linked to polystyrene NPs.

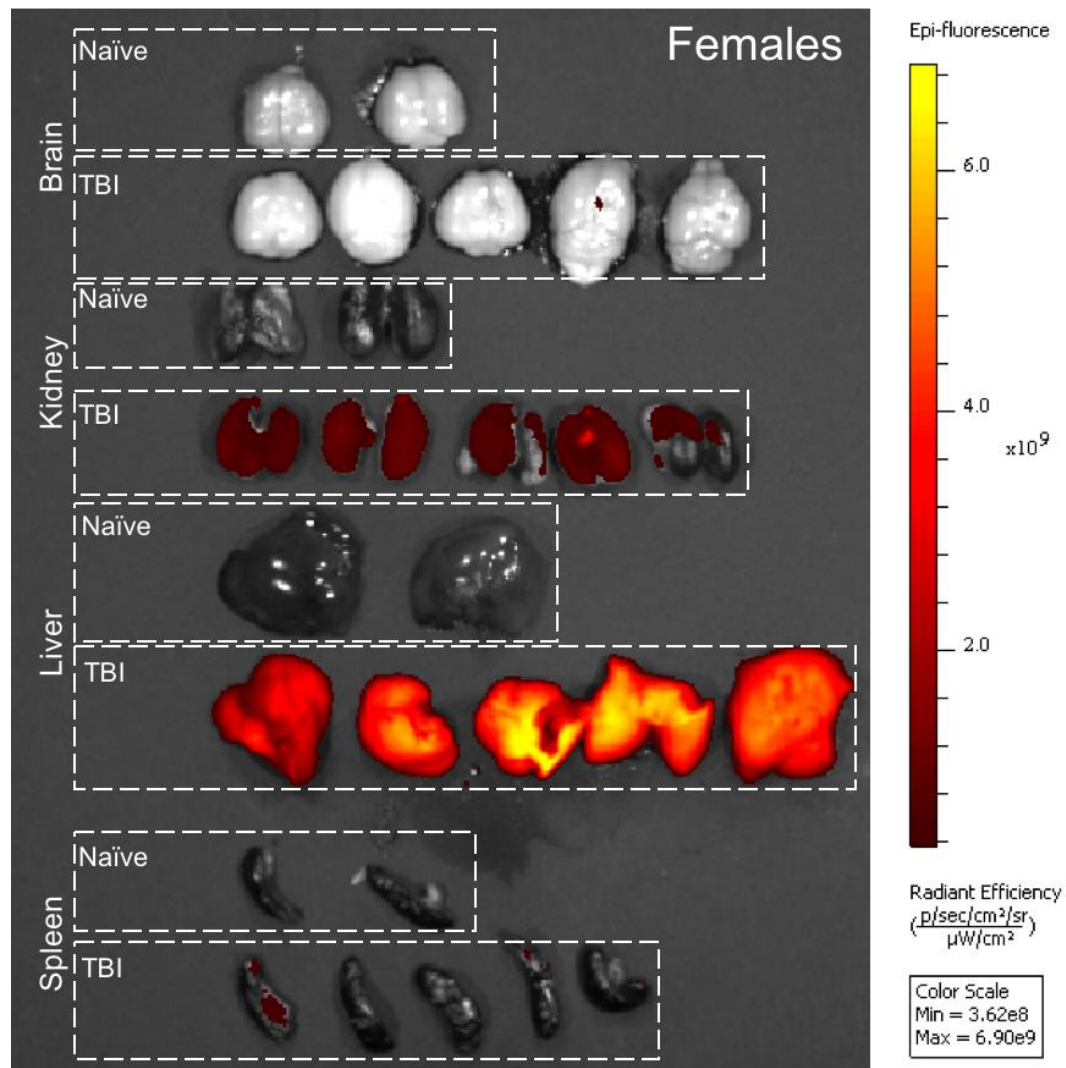

**Fig. S4: Ex vivo biodistribution of nanoparticles after 3 h post-injection.** (a) Ex vivo imaging of brain, kidney, liver and spleen of naïve animals and 7 d post-TBI animals. NP was intravenously injected 3 h before sacrifice. At the time of sacrifice (3 h after NP injection), terminal blood was drawn and plasma containing the NPs was isolated. Plasma concentration showed 30 % of the injected plasma concentration at 3 h post injection.
