# Supplementary material
Source: PubMed Central journal article supplement (PMC7398445)
Supplement: Supp_Fig5.pdf [file Supp_Fig5.pdf]

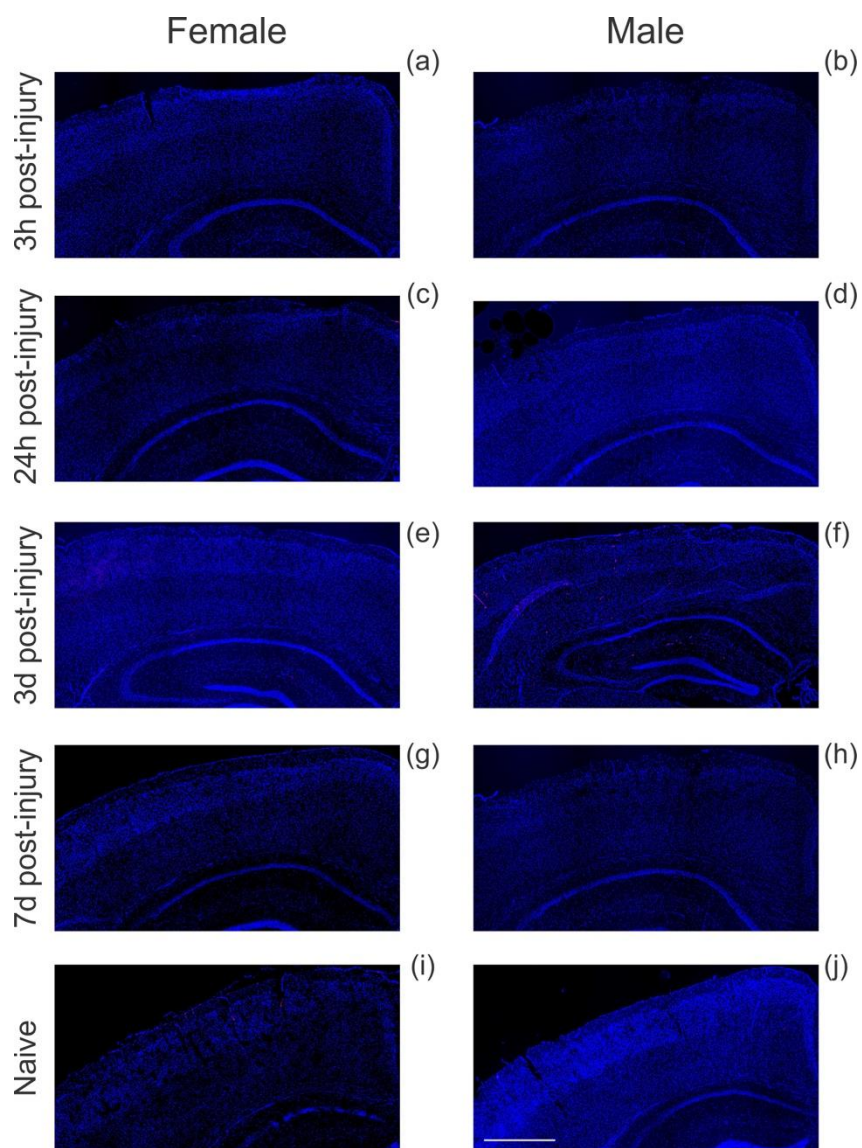

**Fig. S5: NP accumulation analysis after TBI in contralateral hemisphere:** Representative images of contralateral tissue at 3 h ((a)-(b)), 24 h ((c)-(d)), 3 d ((e)-(f)), 7 days ((g)-(h)) post-CCI and naïve ((i)-(j)). The first column shows female cohort and the second column in males. Scale bar = 750  $\mu$ m.
