# Supplementary material
Source: PubMed Central journal article supplement (PMC7398445)
Supplement: Supp_Fig6.pdf [file Supp_Fig6.pdf]

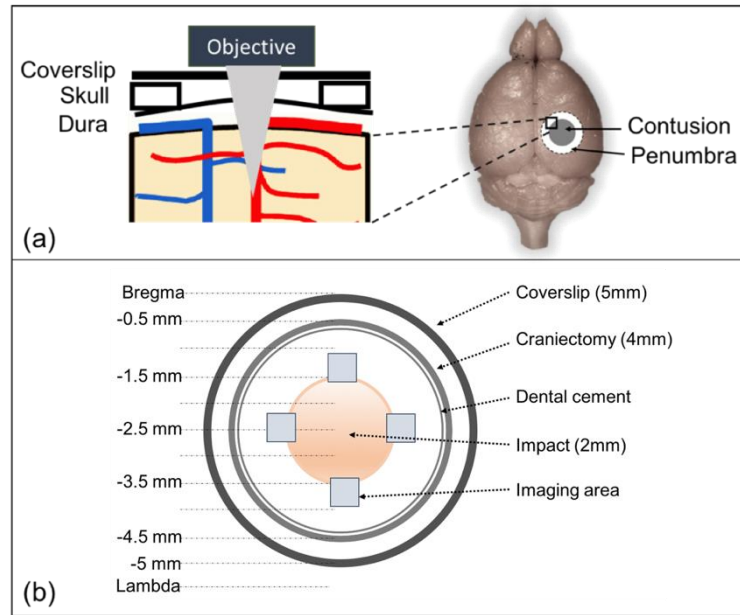

**Fig. S6: The experimental setup for two-photon microscopy imaging.** (a) Sagittal view of the entire setup. (b) Cross sectional view of the location of imaging region with respect to the contusion and penumbra region. Transgenic (CX3CR1-EGFP) female and male mice were used for this study. After a craniectomy (4 mm) and impact (2 mm), a glass coverslip of 5 mm was placed on top of the brain tissue and was secured with dental cement. A water-immersion objective lens was used and the anesthetized animal was secured on stereotaxic stage for two-photon imaging. Imaging area is shown as blue boxes located at the injury penumbra.
