# Supplementary material
Source: PubMed Central journal article supplement (PMC7398445)
Supplement: Supp_Fig7.pdf [file Supp_Fig7.pdf]

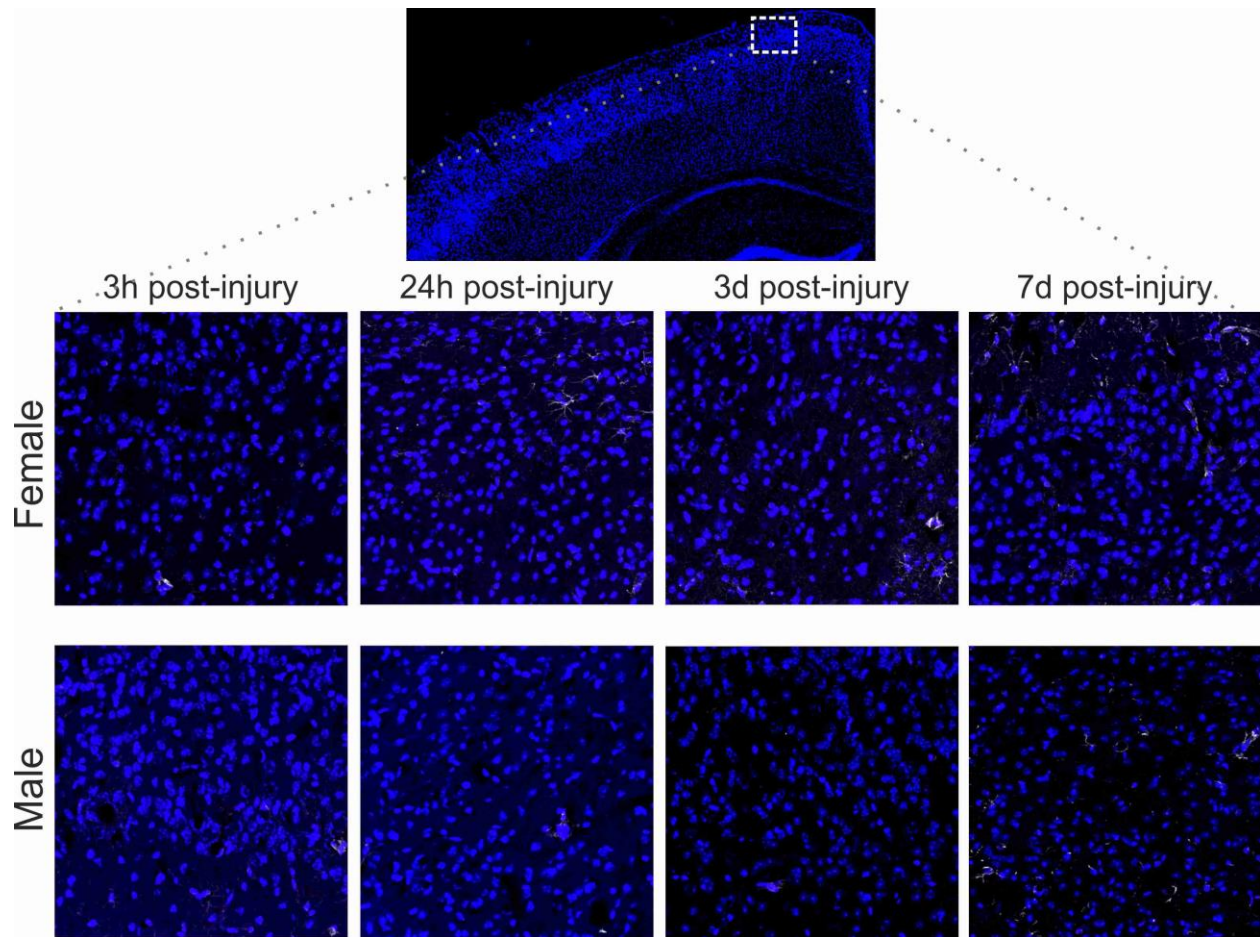

**Fig. S7:** Representative images of anti-glial fibrillary acidic protein (GFAP) staining in the contralateral hemisphere. Astrocyte reactivity at 3 h, 24 h, 3 d, and 7 d post-injury in females (top row) and males (bottom row) are shown in the image.
