# Supplementary material
Source: PubMed Central journal article supplement (PMC7398445)
Supplement: Supp_Table1.pdf [file Supp_Table1.pdf]

|   |                                                | Comparison     | F (DFn, DFd)      | P value  | Significant |
|---|------------------------------------------------|----------------|-------------------|----------|-------------|
| 1 | HRP: Female cohort                             | Interaction    | F (3, 24) = 34.35 | P<0.0001 | Yes         |
|   |                                                | Time points    | F (3, 24) = 34.14 | P<0.0001 | Yes         |
|   |                                                | Ipsi vs Contra | F (1, 24) = 297.4 | P<0.0001 | Yes         |
| 2 | HRP: Male cohort                               | Interaction    | F (3, 24) = 33.46 | P<0.0001 | Yes         |
|   |                                                | Time points    | F (3, 24) = 34.4  | P<0.0001 | Yes         |
|   |                                                | Ipsi vs Contra | F (1, 24) = 177.7 | P<0.0001 | Yes         |
| 3 | HRP: Female vs<br>Male cohort<br>(ipsilateral) | Interaction    | F (3, 24) = 4.519 | P=0.0119 | Yes         |
|   |                                                | Time points    | F (3, 24) = 67.64 | P<0.0001 | Yes         |
|   |                                                | Sex            | F (1, 24) = 17.23 | P=0.0004 | Yes         |

**Supplementary Table 1.** Statistical analysis results of HRP extravasation: Tabular results of two-way ANOVA of extravasation of intravenously injected macromolecular tracer (horseradish peroxidase) after focal brain injury. Row 1 shows the two-way ANOVA results of female cohort, row 2 shows the results of male cohort and row 3 shows the result of ipsilateral hemisphere comparison of female and male cohort.
