# Supplementary material
Source: PubMed Central journal article supplement (PMC7398445)
Supplement: Supp_Table2.pdf [file Supp_Table2.pdf]

|   |                                         | <b>Comparison</b> | <b>F (DFn, DFd)</b> | <b>P value</b> | <b>Significant</b> |
|---|-----------------------------------------|-------------------|---------------------|----------------|--------------------|
| 1 | NP: Female cohort                       | Interaction       | F (3, 24) = 23.19   | P<0.0001       | Yes                |
|   |                                         | Time points       | F (3, 24) = 22.73   | P<0.0001       | Yes                |
|   |                                         | Ipsi vs Contra    | F (1, 24) = 100.6   | P<0.0001       | Yes                |
| 2 | NP: Male cohort                         | Interaction       | F (3, 24) = 128.5   | P<0.0001       | Yes                |
|   |                                         | Time points       | F (3, 24) = 134.1   | P<0.0001       | Yes                |
|   |                                         | Ipsi vs Contra    | F (1, 24) = 236.5   | P<0.0001       | Yes                |
| 3 | NP: Female vs Male cohort (ipsilateral) | Interaction       | F (3, 24) = 4.876   | P=0.0087       | Yes                |
|   |                                         | Time points       | F (3, 24) = 94.85   | P<0.0001       | Yes                |
|   |                                         | Sex               | F (1, 24) = 1.45    | P=0.2402       | No                 |

**Supplementary Table 2.** Statistical analysis results of NP accumulation: Tabular results of two-way ANOVA of intravenously injected NP accumulation after focal brain injury. Row 1 shows the two-way ANOVA results of female cohort, row 2 shows the results of male cohort and row 3 shows the result of ipsilateral hemisphere comparison of female and male cohort.
