# Supplementary material
Source: PubMed Central journal article supplement (PMC7398445)
Supplement: Supp_Table3.pdf [file Supp_Table3.pdf]

| Comparison  | F (DFn, DFd)       | P value  | Significant |
|-------------|--------------------|----------|-------------|
| Interaction | F (3, 32) = 0.3234 | P=0.8084 | No          |
| Time points | F (3, 32) = 9.445  | P=0.0001 | Yes         |
| Sex         | F (1, 32) = 11.68  | P=0.0017 | Yes         |

**Supplementary Table 3.** Statistical analysis results of T2 weighted MRI lesion volume: Tabular results of two-way ANOVA of lesion volume (# voxels) in the ipsilateral cortex comparisons between sexes after focal brain injury.

---
