# Supplementary material
Source: PubMed Central journal article supplement (PMC7398445)
Supplement: Supp_Table4.pdf [file Supp_Table4.pdf]

|   |                                           | <b>Comparison</b> | <b>F (DFn, DFd)</b> | <b>P value</b> | <b>Significant</b> |
|---|-------------------------------------------|-------------------|---------------------|----------------|--------------------|
| 1 | GFAP: Female cohort                       | Interaction       | F (3, 24) = 6.332   | P=0.0026       | Yes                |
|   |                                           | Time points       | F (3, 24) = 5.605   | P=0.0047       | Yes                |
|   |                                           | Ipsi vs Contra    | F (1, 24) = 19.99   | P=0.0002       | Yes                |
| 2 | GFAP: Male cohort                         | Interaction       | F (3, 24) = 10.15   | P=0.0002       | Yes                |
|   |                                           | Time points       | F (3, 24) = 11.94   | P<0.0001       | Yes                |
|   |                                           | Ipsi vs Contra    | F (1, 24) = 28.96   | P<0.0001       | Yes                |
| 3 | GFAP: Female vs Male cohort (ipsilateral) | Interaction       | F (3, 24) = 0.0868  | P=0.9666       | No                 |
|   |                                           | Time points       | F (3, 24) = 15.63   | P<0.0001       | Yes                |
|   |                                           | Sex               | F (1, 24) = 0.2255  | P=0.6391       | No                 |

**Supplementary Table 4.** Statistical analysis results of percentage area of GFAP staining after focal brain injury. Tabular results of two-way ANOVA of percent area GFAP positive staining comparisons between sexes after focal brain injury. Row 1 shows the two-way ANOVA results of female cohort, row 2 shows the results of male cohort and row 3 shows the result of ipsilateral hemisphere comparison of female and male cohort.
